# Supplementary material for: The Prolyl Isomerase Pin1 Is a Novel Target of 6,7,4′-Trihydroxyisoflavone for Suppressing Esophageal Cancer Growth
Source: Oxford University Press journal article supplement (doi:10.1158/1940-6207.capr-16-0318), 2017-03-21
Supplement: 19406207capr160318-sup-175713_2_supp_3906984_5mrcv5.docx [file 19406207capr160318-sup-175713_2_supp_3906984_5mrcv5.docx]

**Supplemental Figure Legend**

**Supplementary Figure 1. 6,7,4’-THIF does not bind to FKBP or cyclophilin A.** The interaction between 6,7,4’-THIF and FKBP or cyclophilin A was confirmed using 6,7,4’-THIF-Sepharose 4B beads. 6,7,4’-THIF-Sepharose 4B beads were incubated with each cell lysate overnight. Total experimental procedures are described in Materials and Methods.

**Supplementary Figure 2. Pin1 is overexpressed in esophageal cancer cells.** The protein expression level of Pin1 was compared between normal (HaCaT) cells and esophageal cancer cells (KYSE 30, 450 and 510). The same amount of protein was analyzed by Western blot as described in Materials and Methods.

**Supplementary Figure 3. 6,7,4’-THIF inhibits esophageal cancer cell growth more effectively than 7,8,4’-THIF.** 6,7,4’-THIF shows a better inhibitory effect on (**A)** KYSE 30, **(B)** 450 or **(C)** 510 esophageal cancer cell growth compared to 7,8,4’-THIF. Cell growth was estimated by MTS assay after 72 h of treatment. Total experimental procedures are described in Materials and Methods.
